# Supplementary material
Source: PubMed Central journal article supplement (PMC5452013)

Fig 1E inset

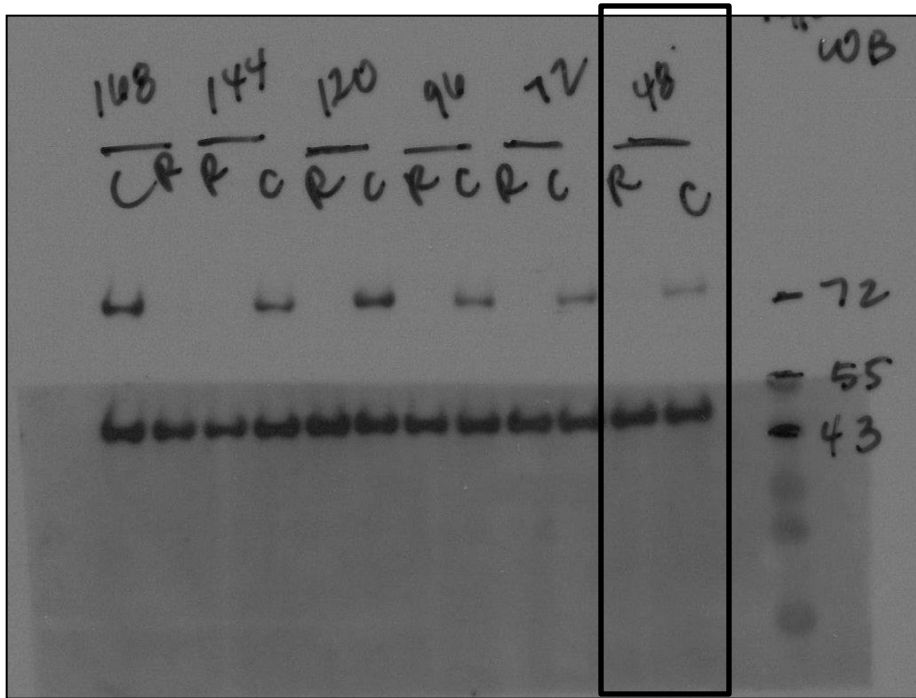

Figure 1G inset

09-07-16

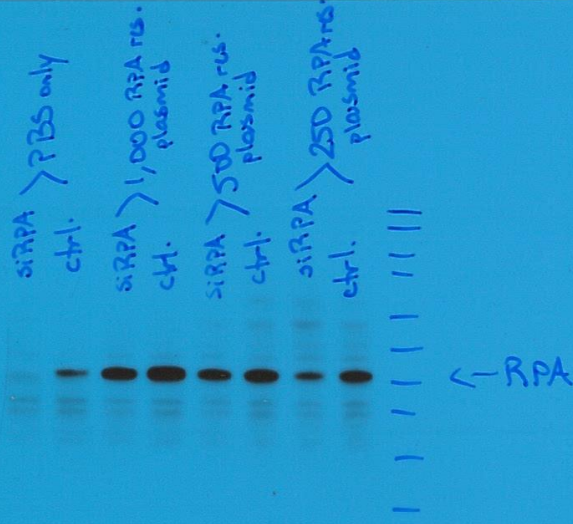

RPA plasmid resistant to siRNA.

09-07-16

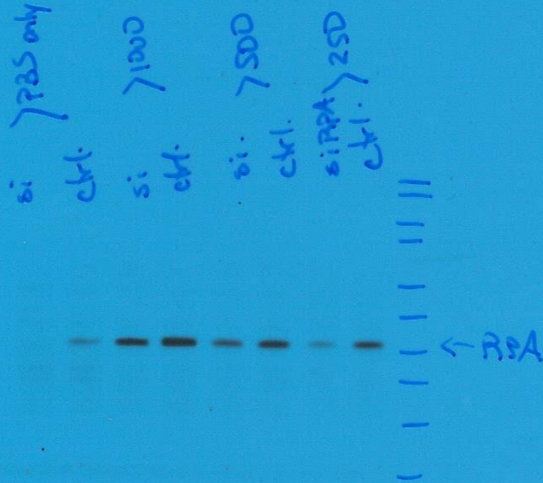

RPA plasmid resistant to siRNA

Figure 1G inset

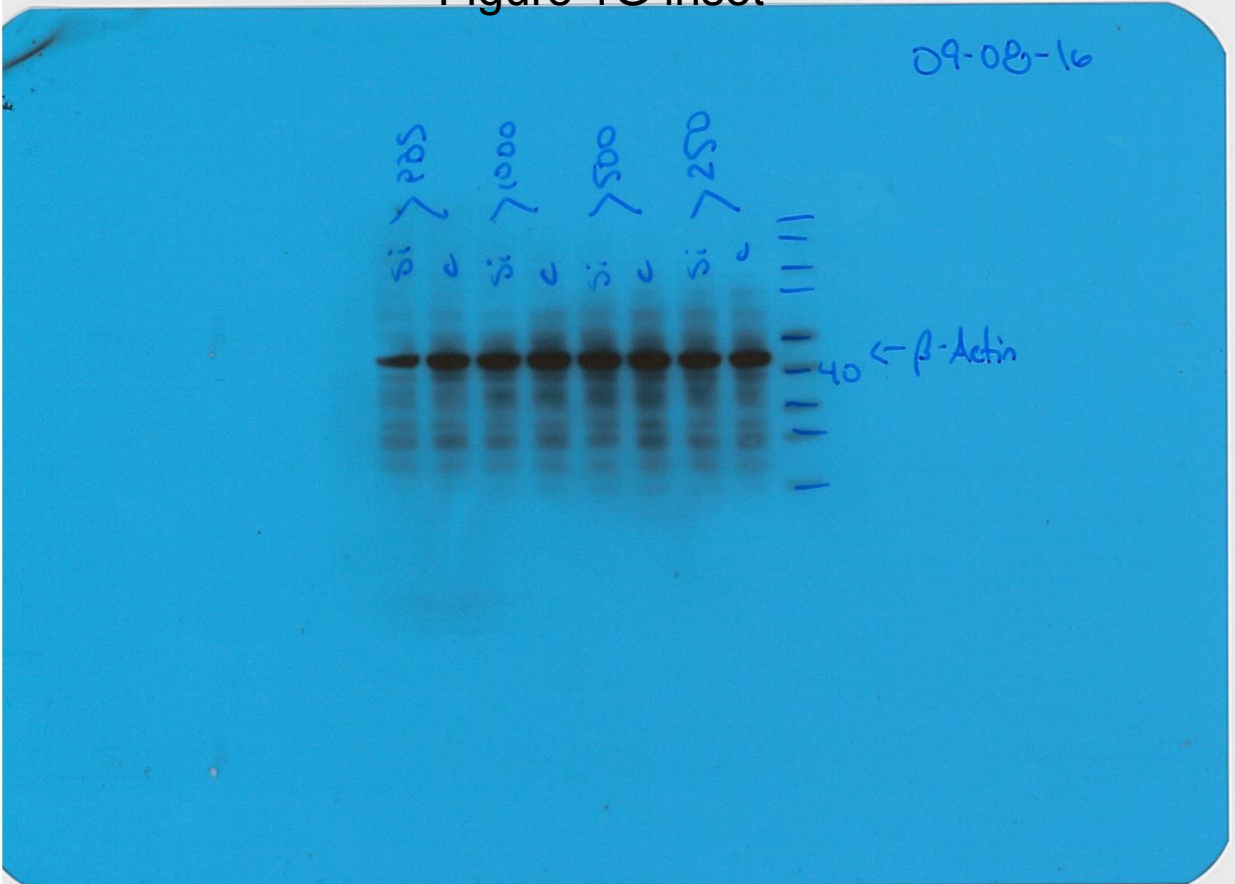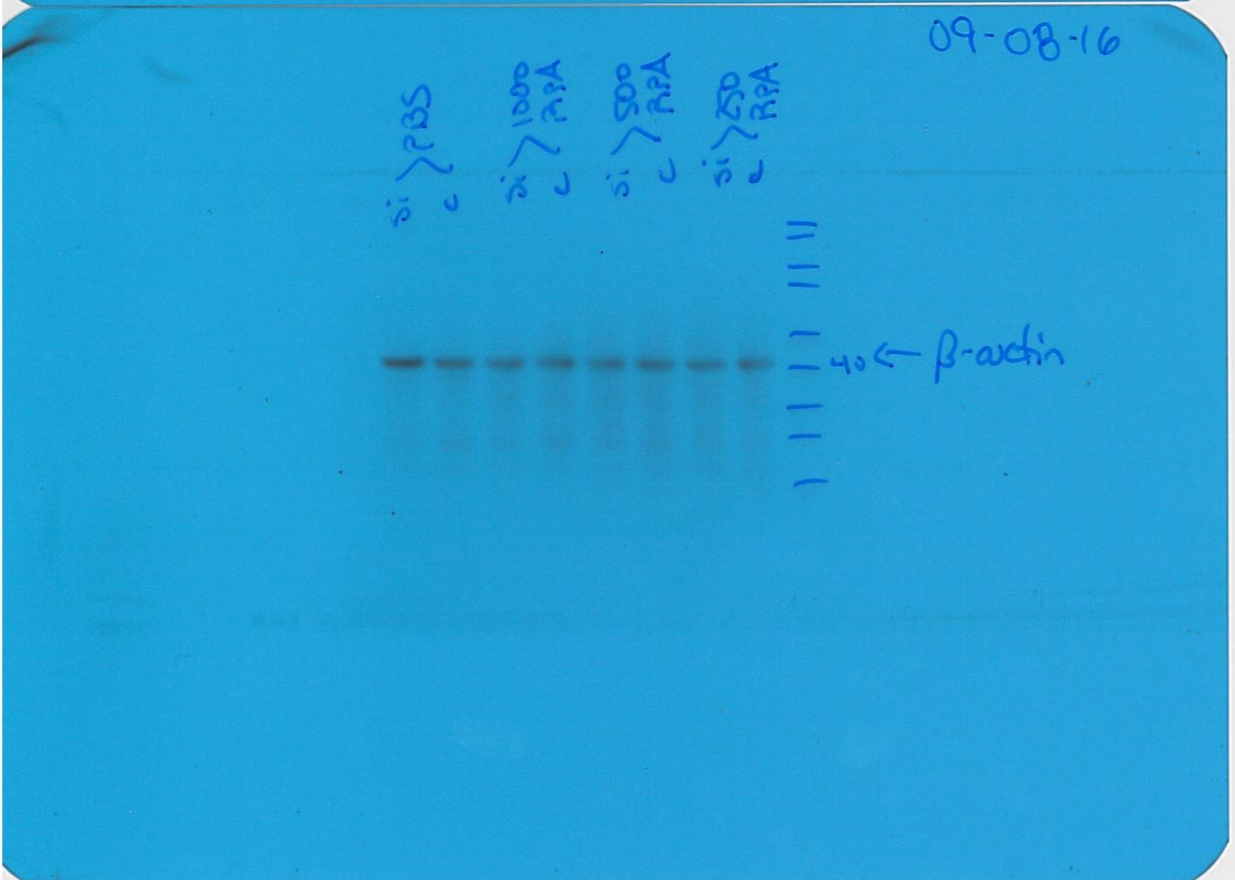

Supplement: EMBJ-36-1605-s003.pdf [file EMBJ-36-1605-s003.pdf]
