# Supplementary material
Source: PubMed Central journal article supplement (PMC5452013)

Fig 3B Lane 1-7

new exposure - 4000 counts + 10000 counts loading

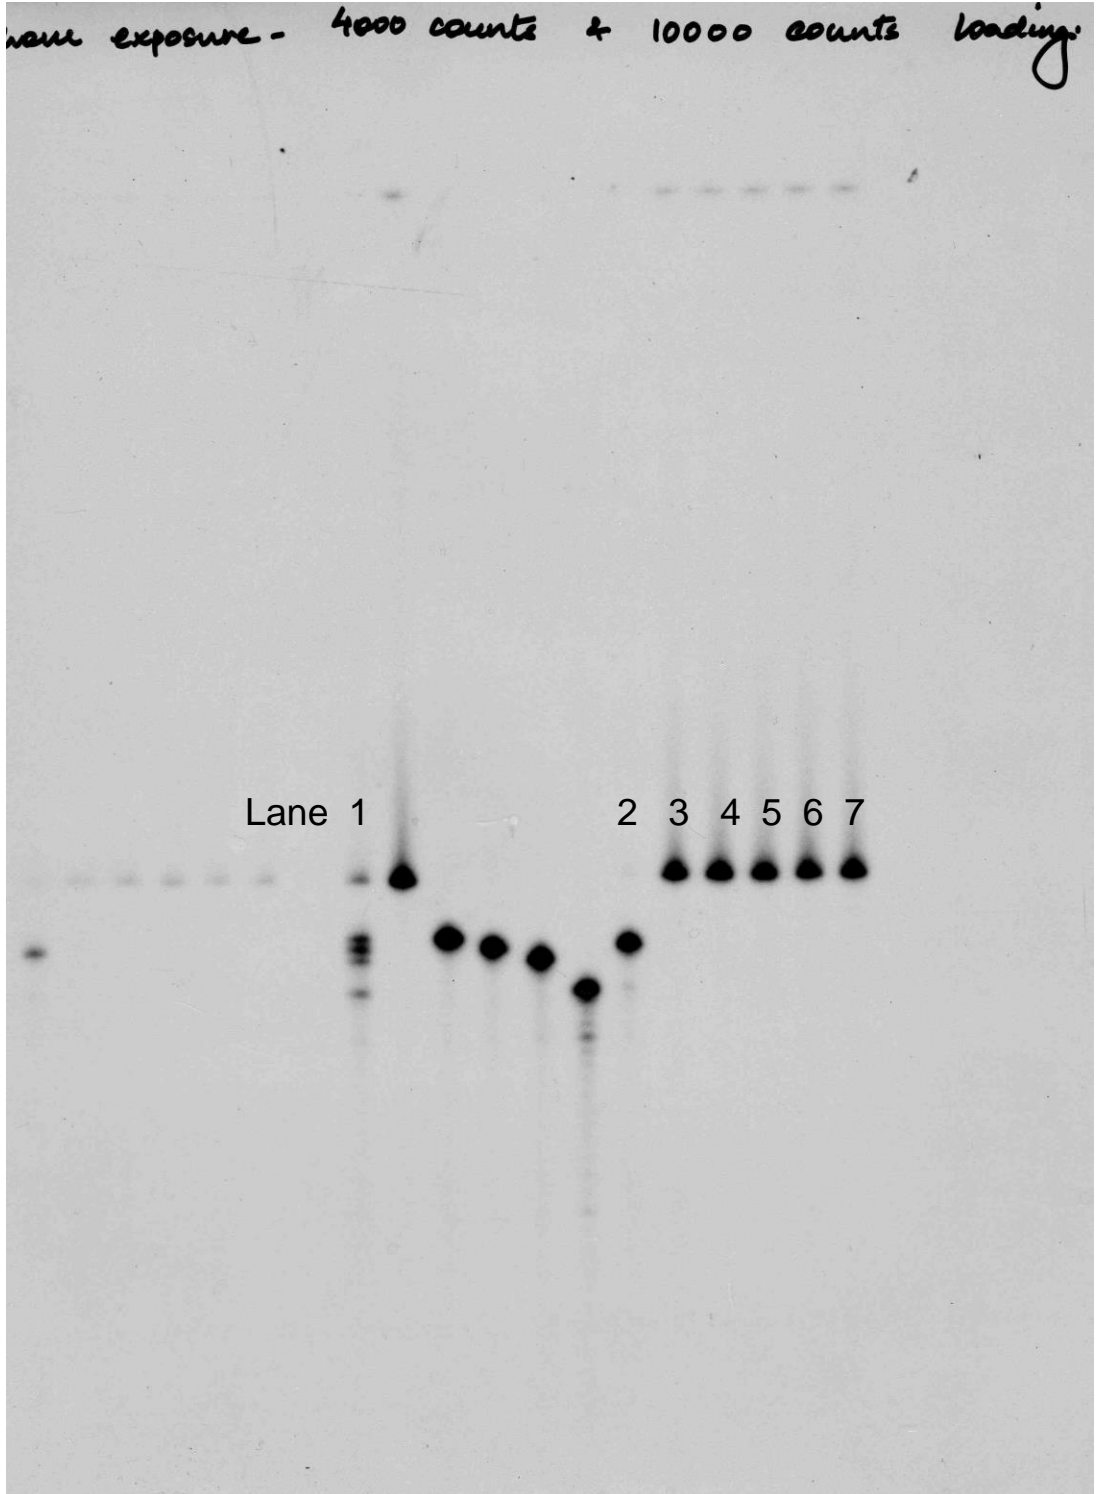

Fig 3B Lane 8-9

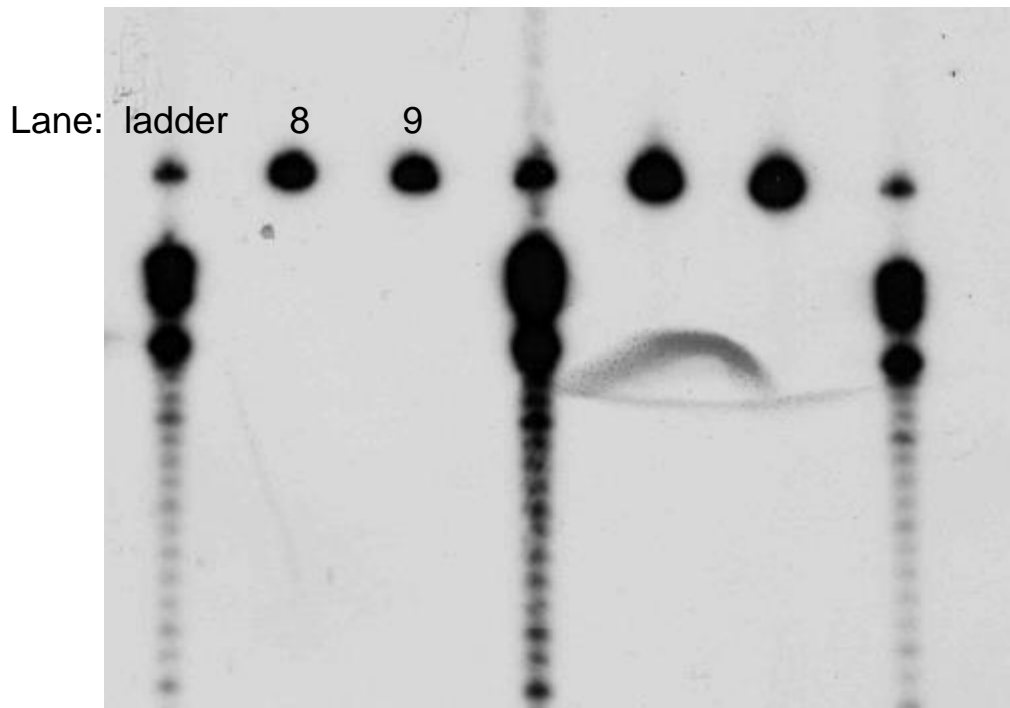

Fig. 3C 1-18

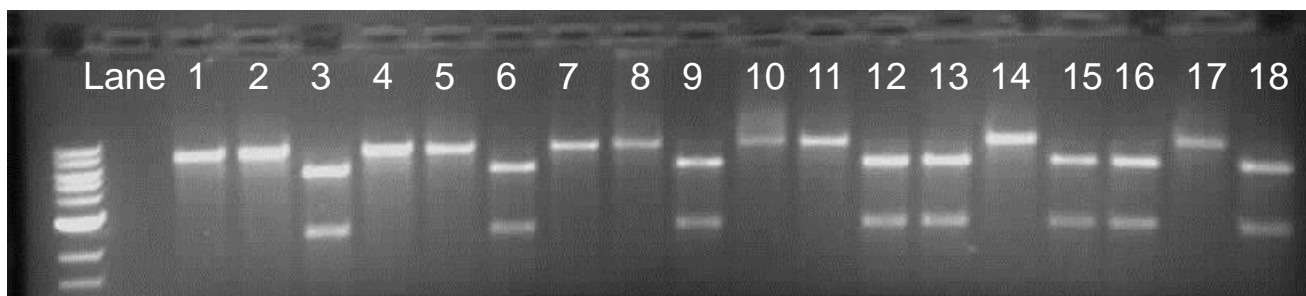

Fig. 3C 19 -21

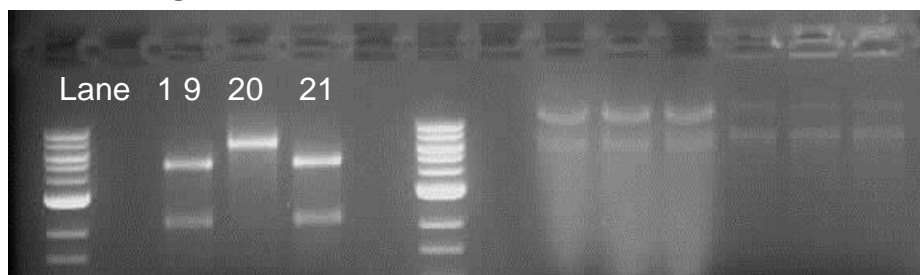

Fig. 3D

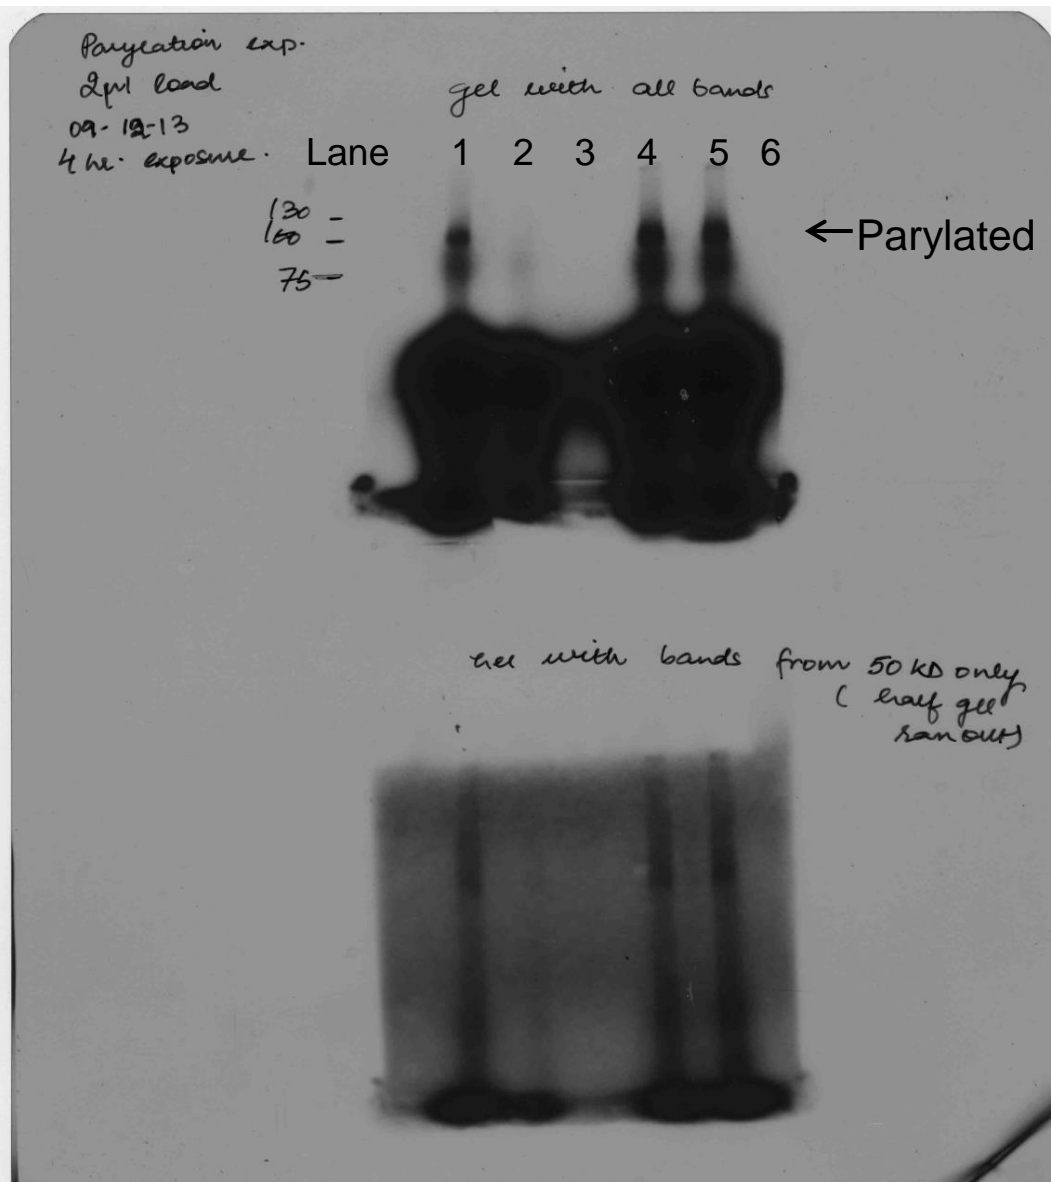

Fig 3E

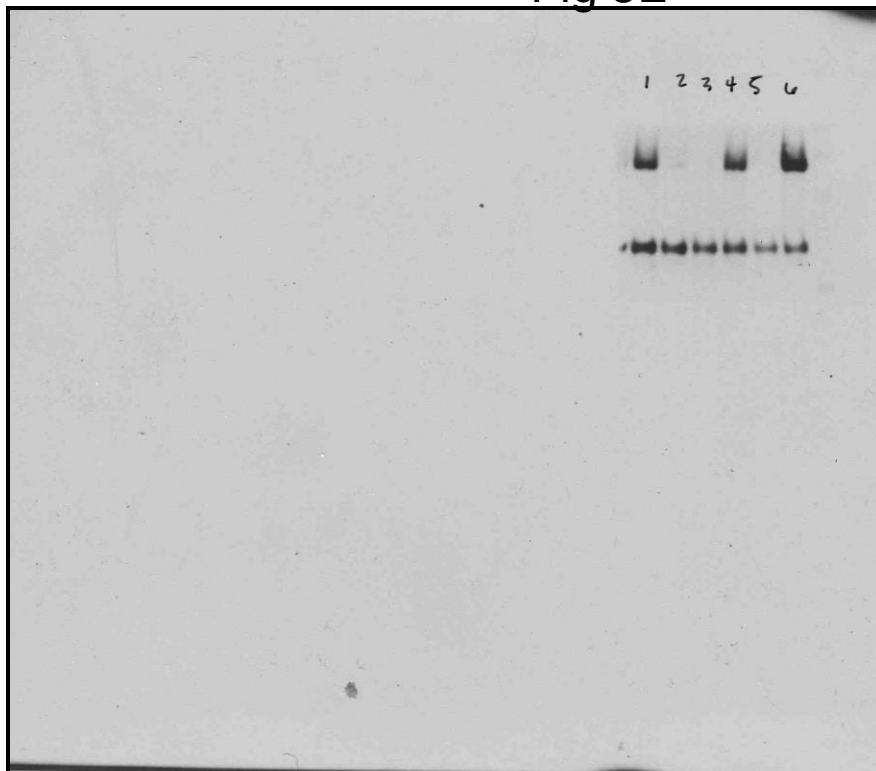

PARP  
recruited

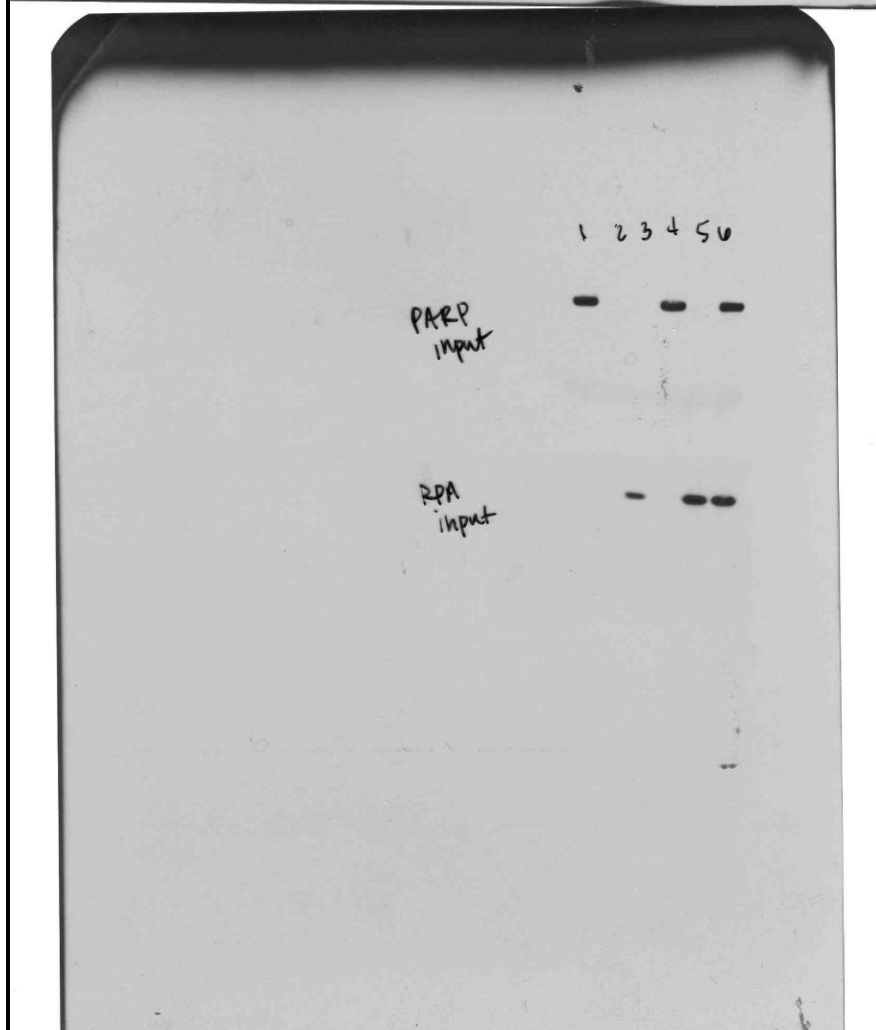

PARP input

Fig 3E

RPA input

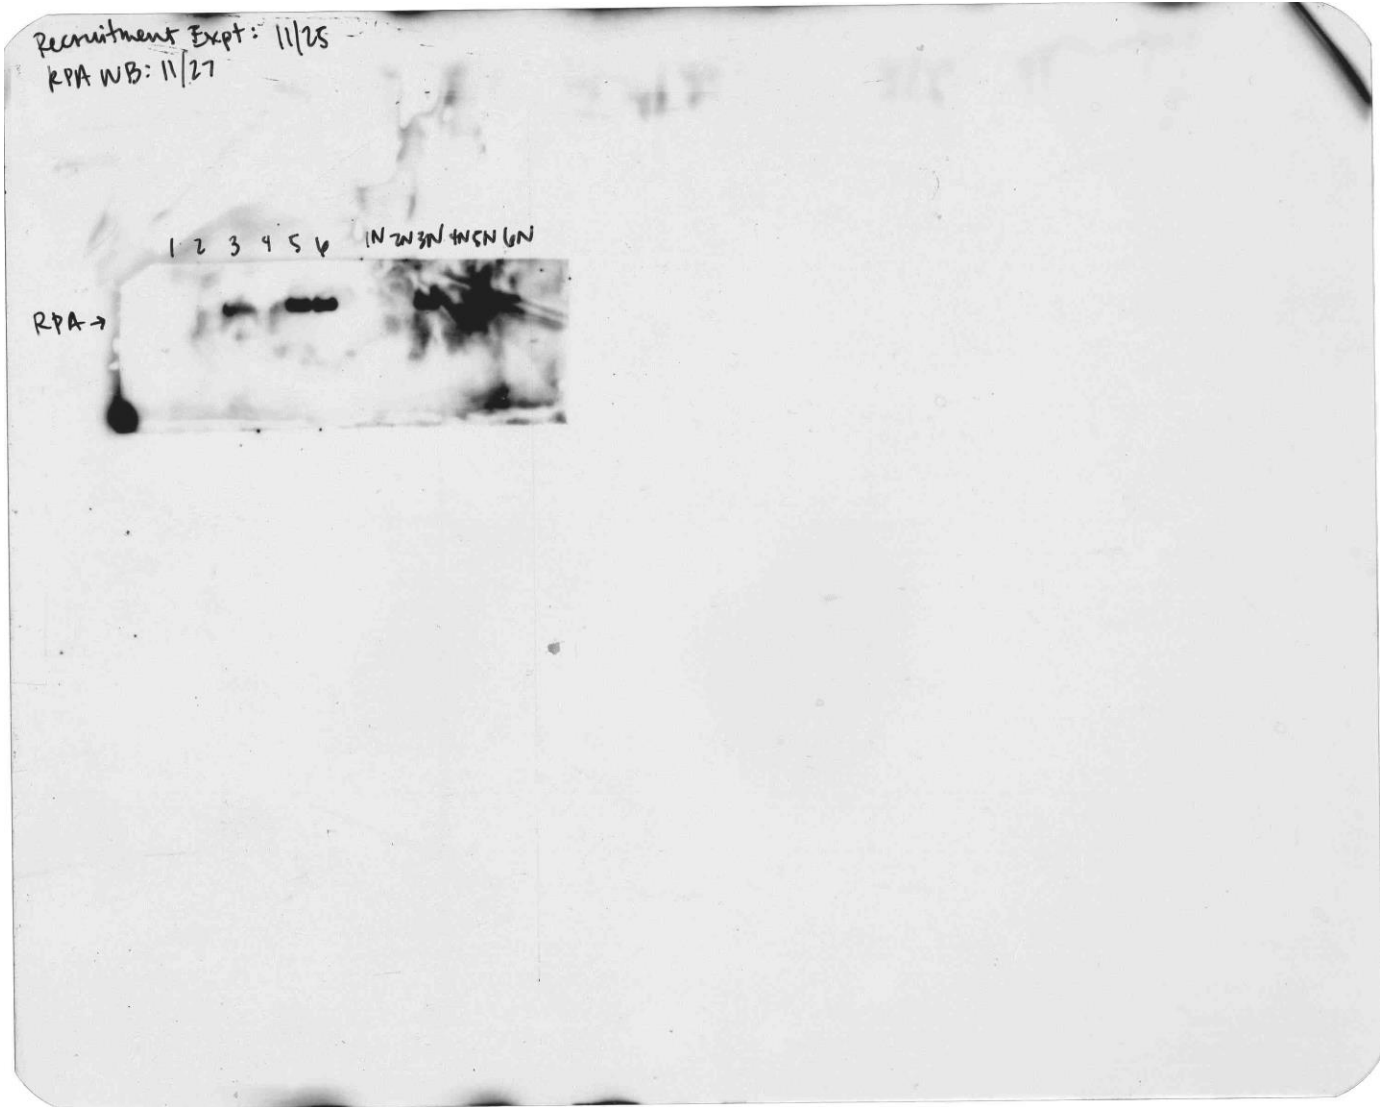

Fig 3E

RPA recruited

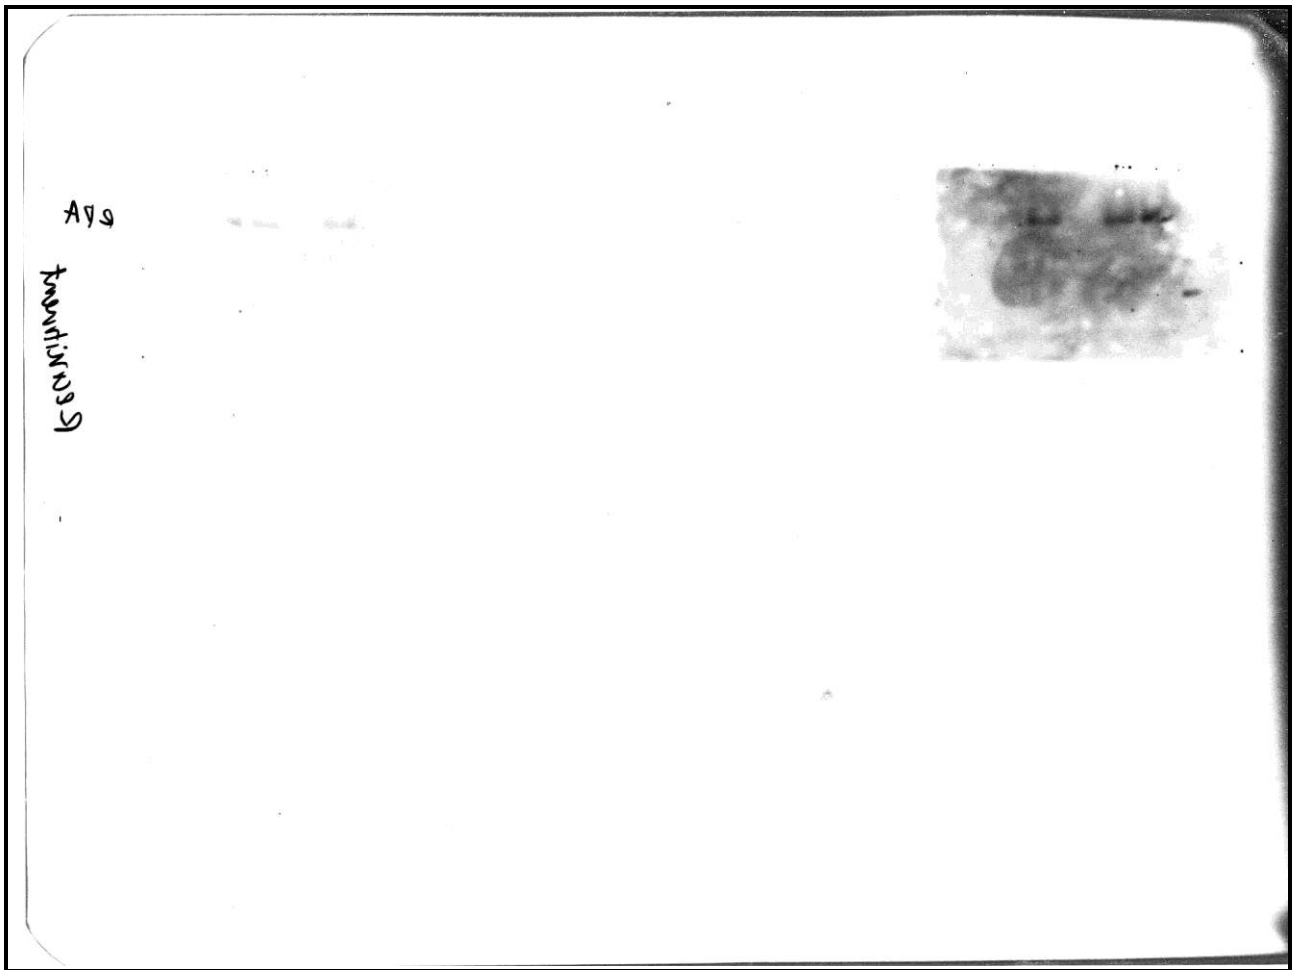

Fig 3E

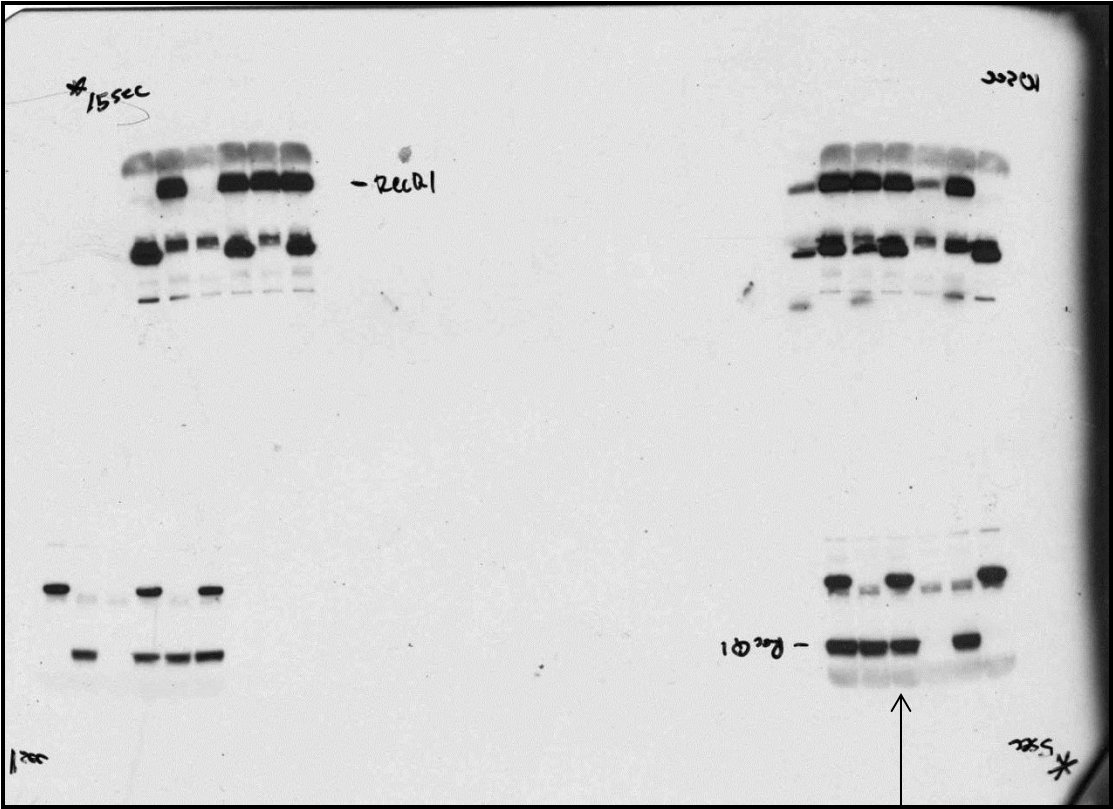

RQ1 input



Fig 3E

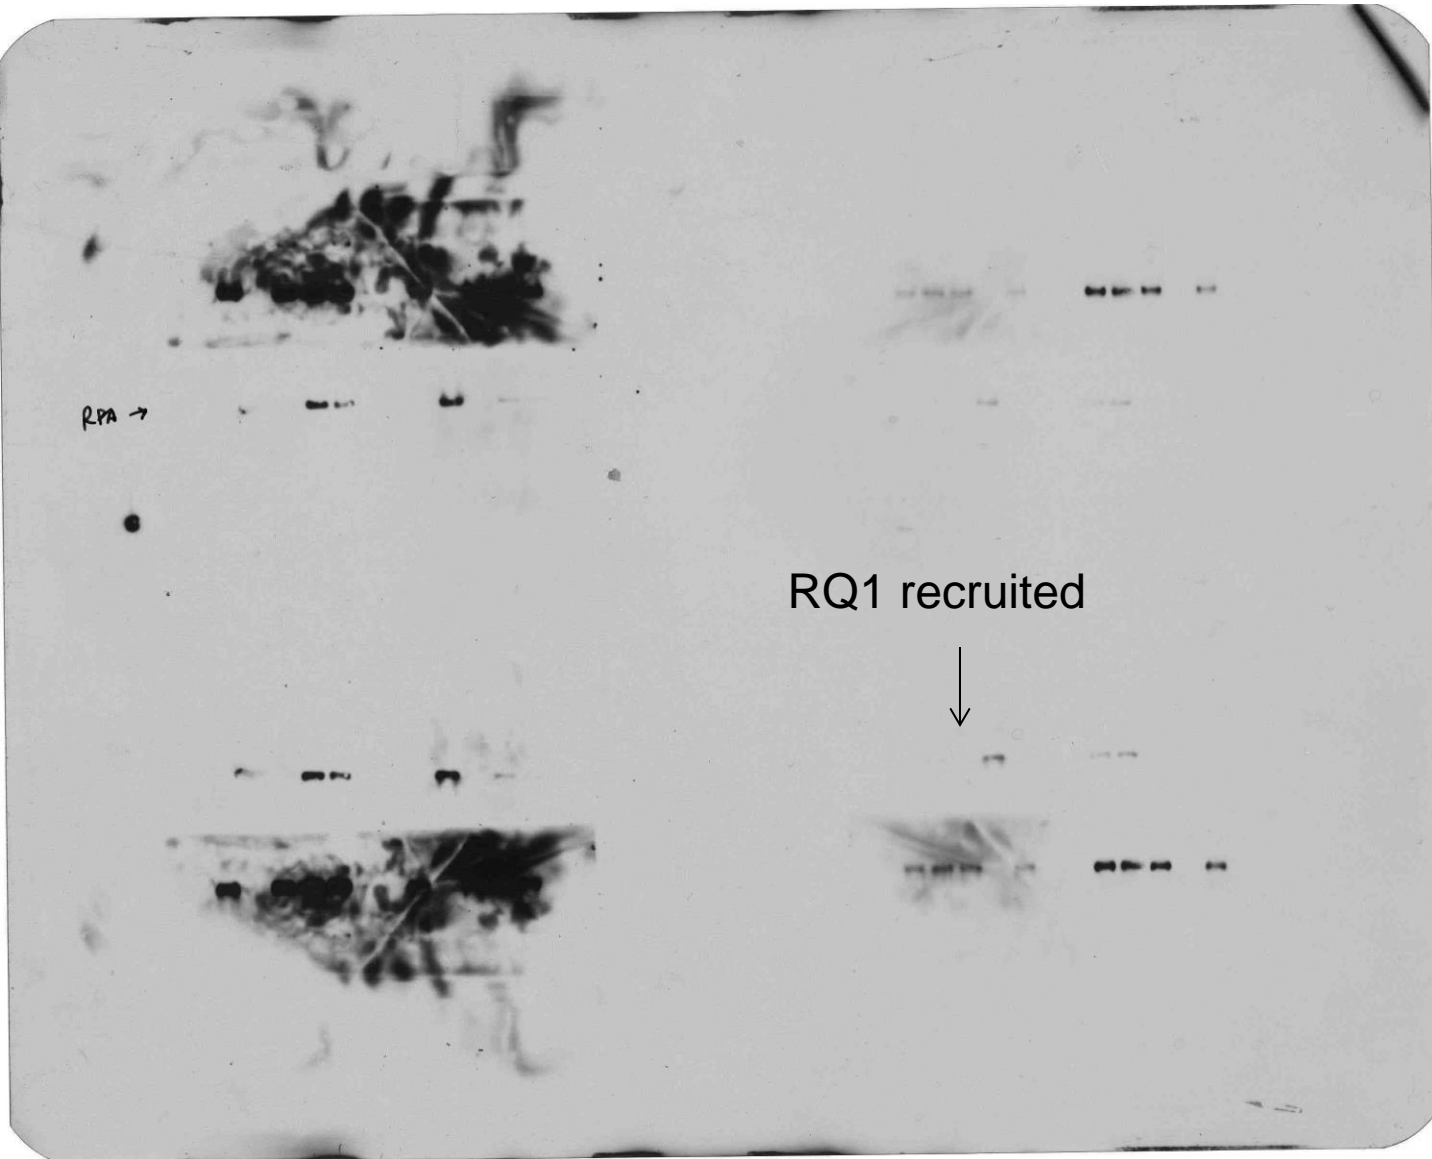

Fig 3E

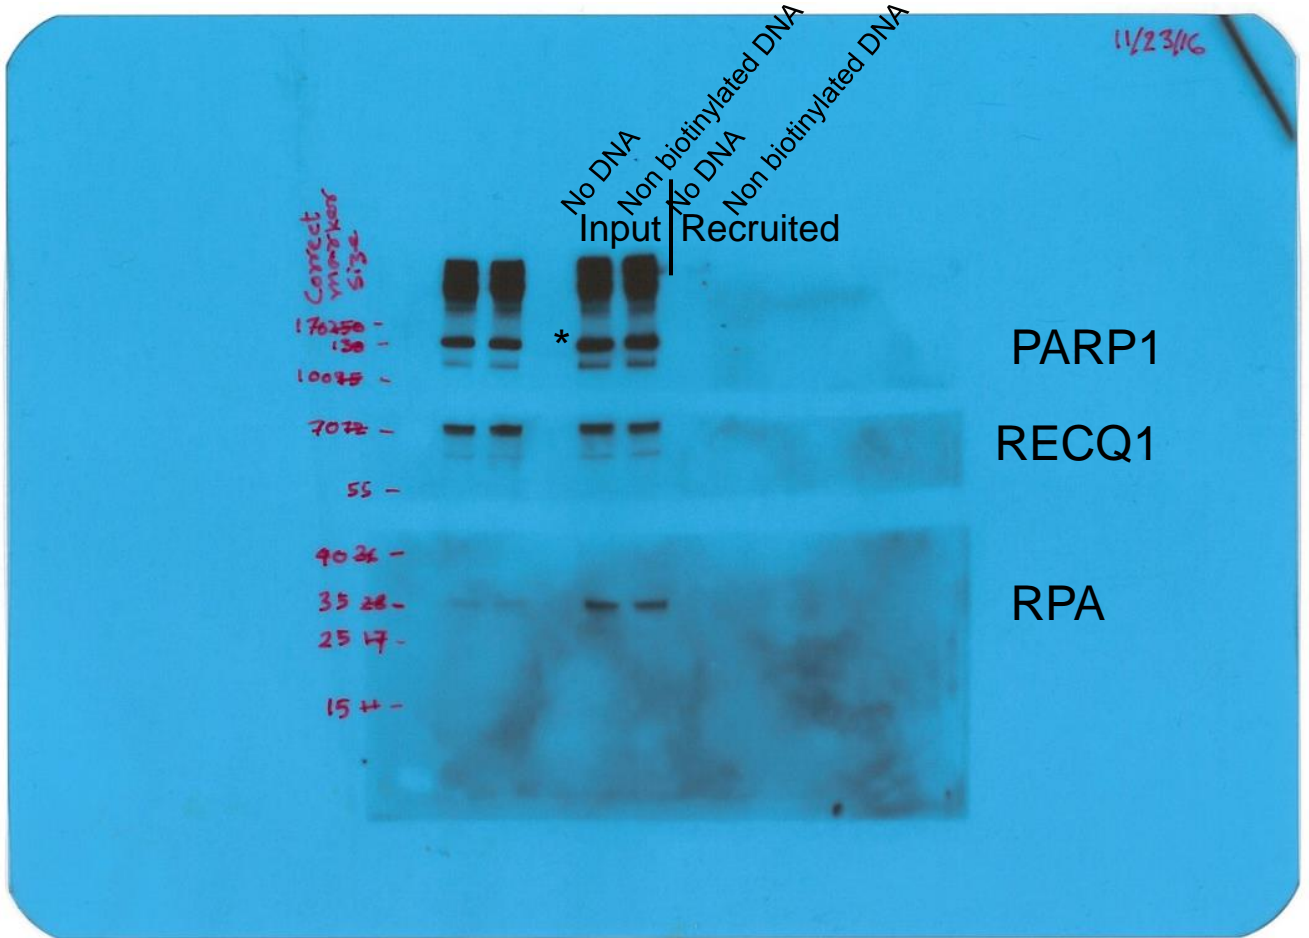

Supplement: EMBJ-36-1605-s005.pdf [file EMBJ-36-1605-s005.pdf]
