# Supplementary material
Source: PubMed Central journal article supplement (PMC5452013)

Fig 4A inset

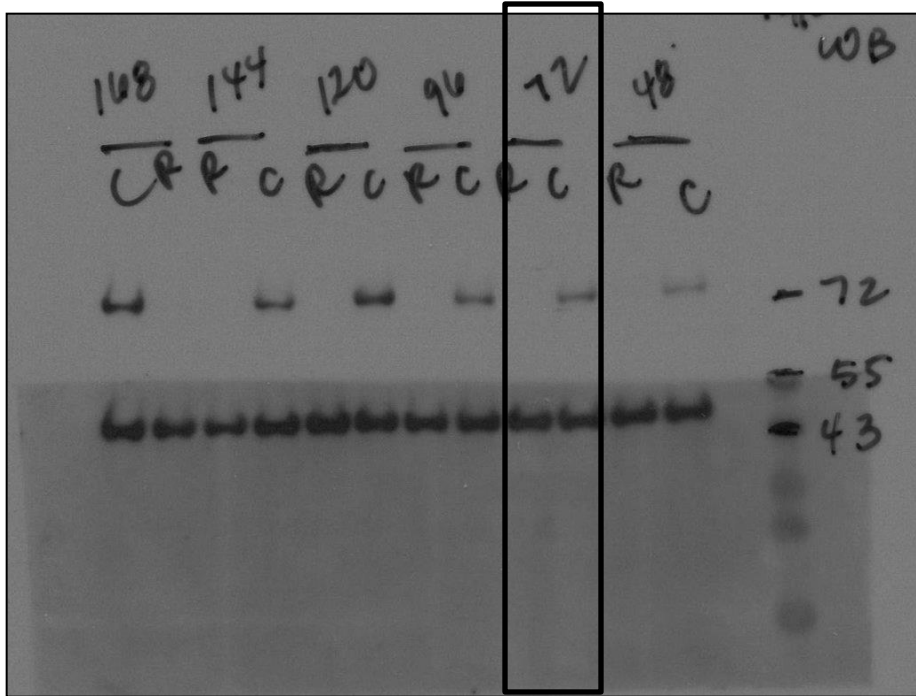

Figure 4D inset

2 min exposure.  
- Exposed again after putting an additional layer on after blocking after developing to clean up the background.

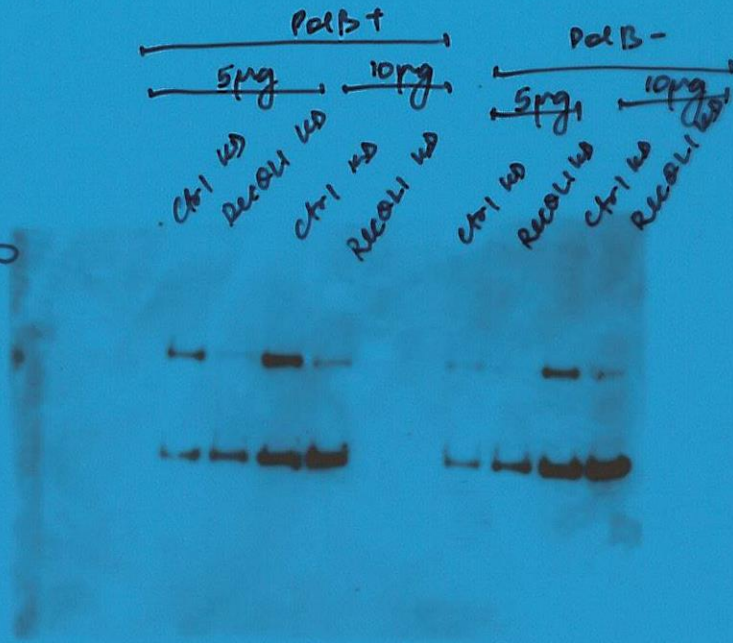

Supplement: EMBJ-36-1605-s006.pdf [file EMBJ-36-1605-s006.pdf]
