# Supplementary material
Source: PubMed Central journal article supplement (PMC5452013)

Fig. 2B 1-3

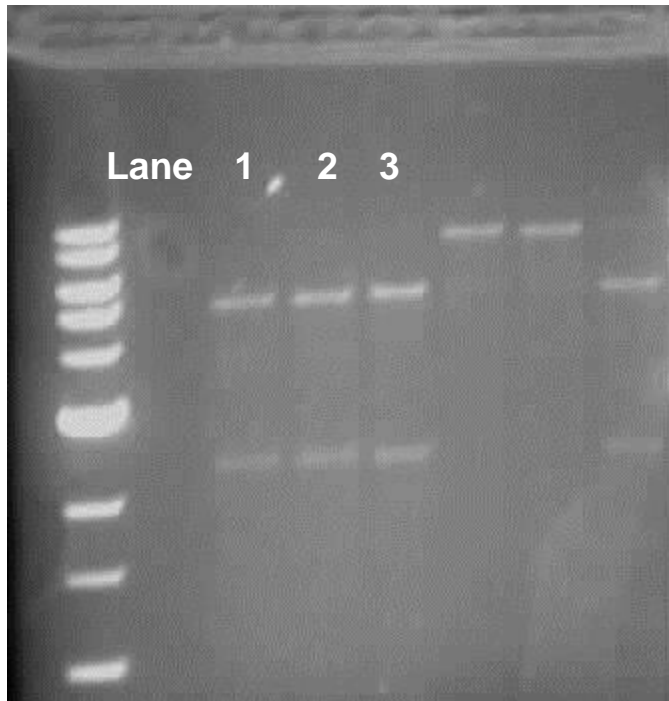

Fig. 2B Lanes 4-13

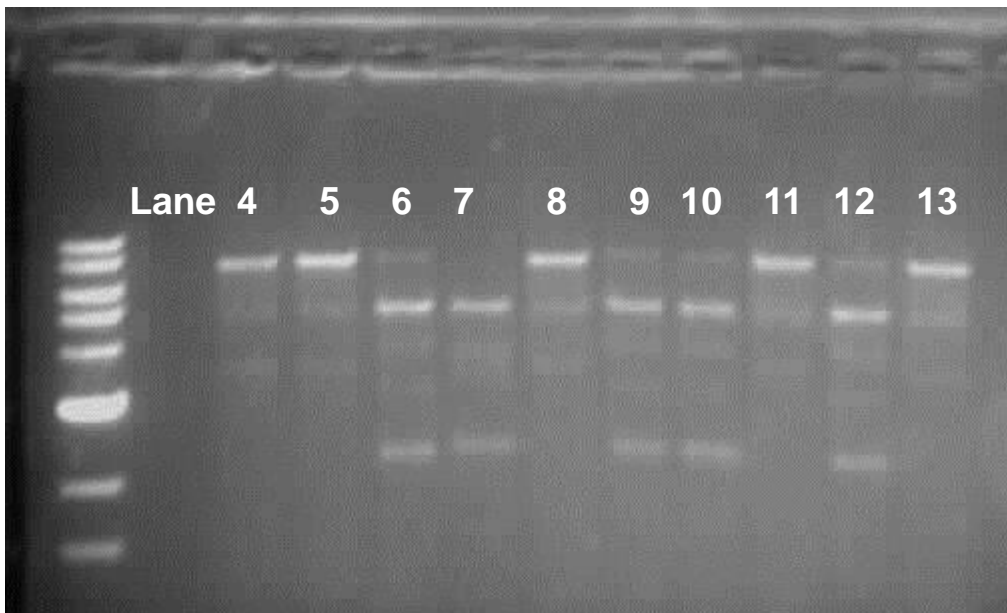

Fig. 2C Lanes 1-3

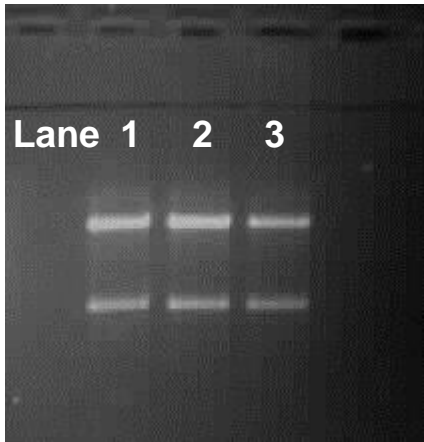

Fig. 2C Lanes 4-18

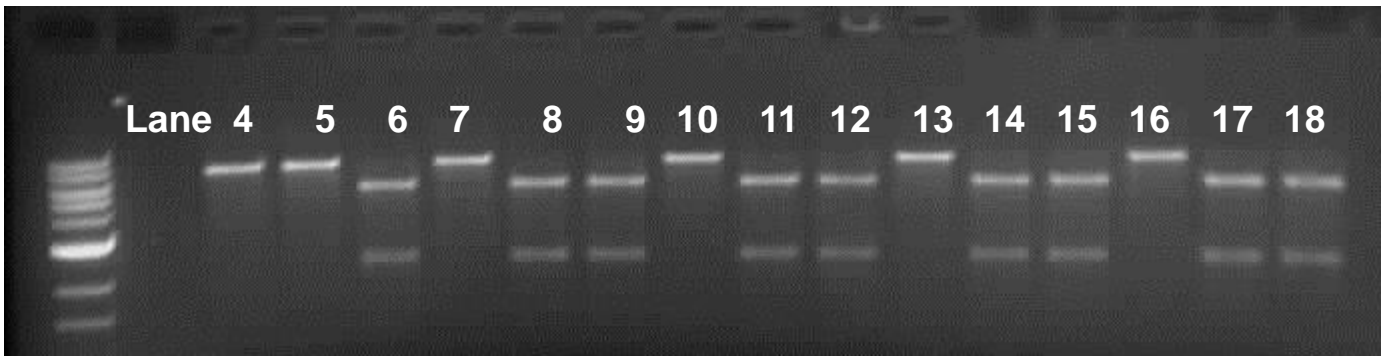

Fig. 2C Lanes 19 - 24

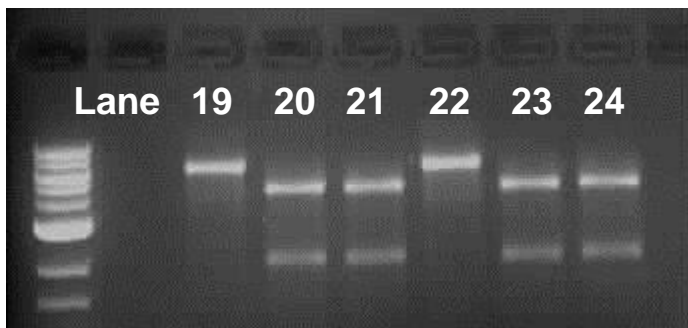

Supplement: EMBJ-36-1605-s004.pdf [file EMBJ-36-1605-s004.pdf]

Figure 5H

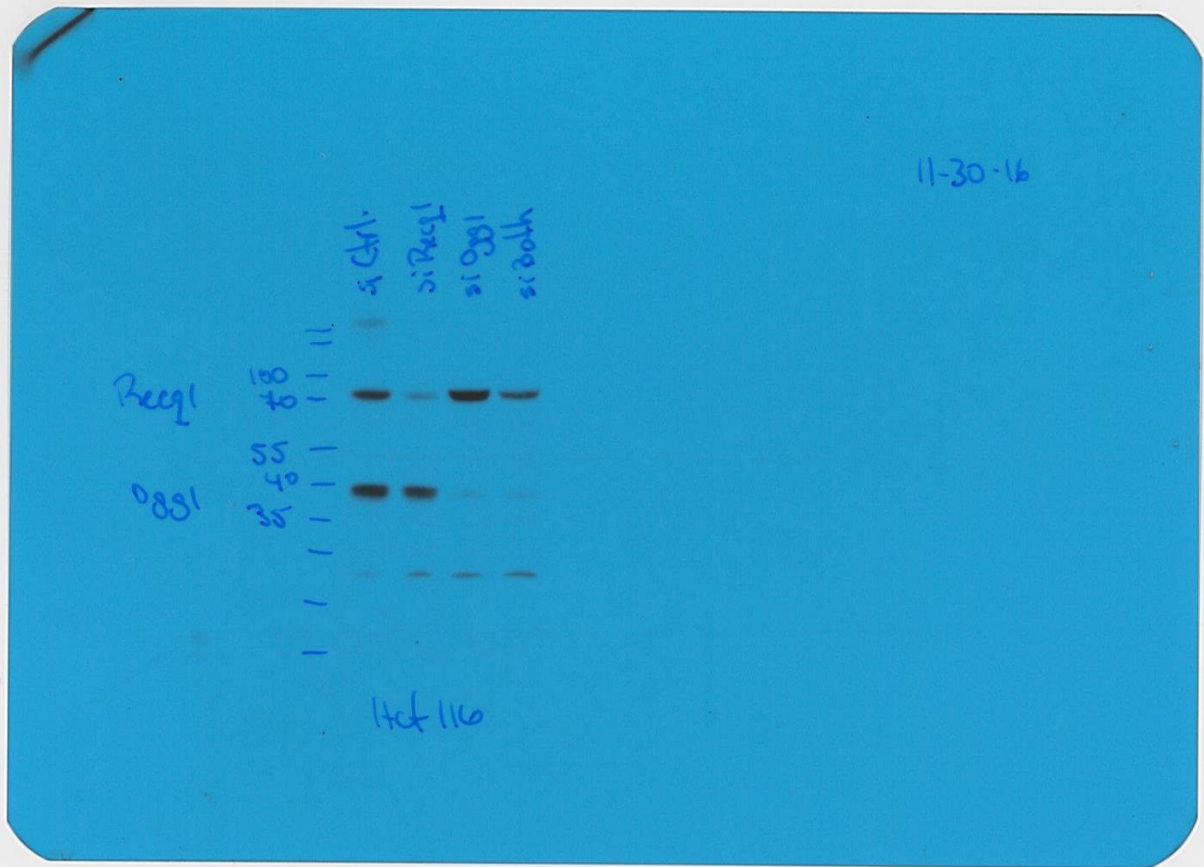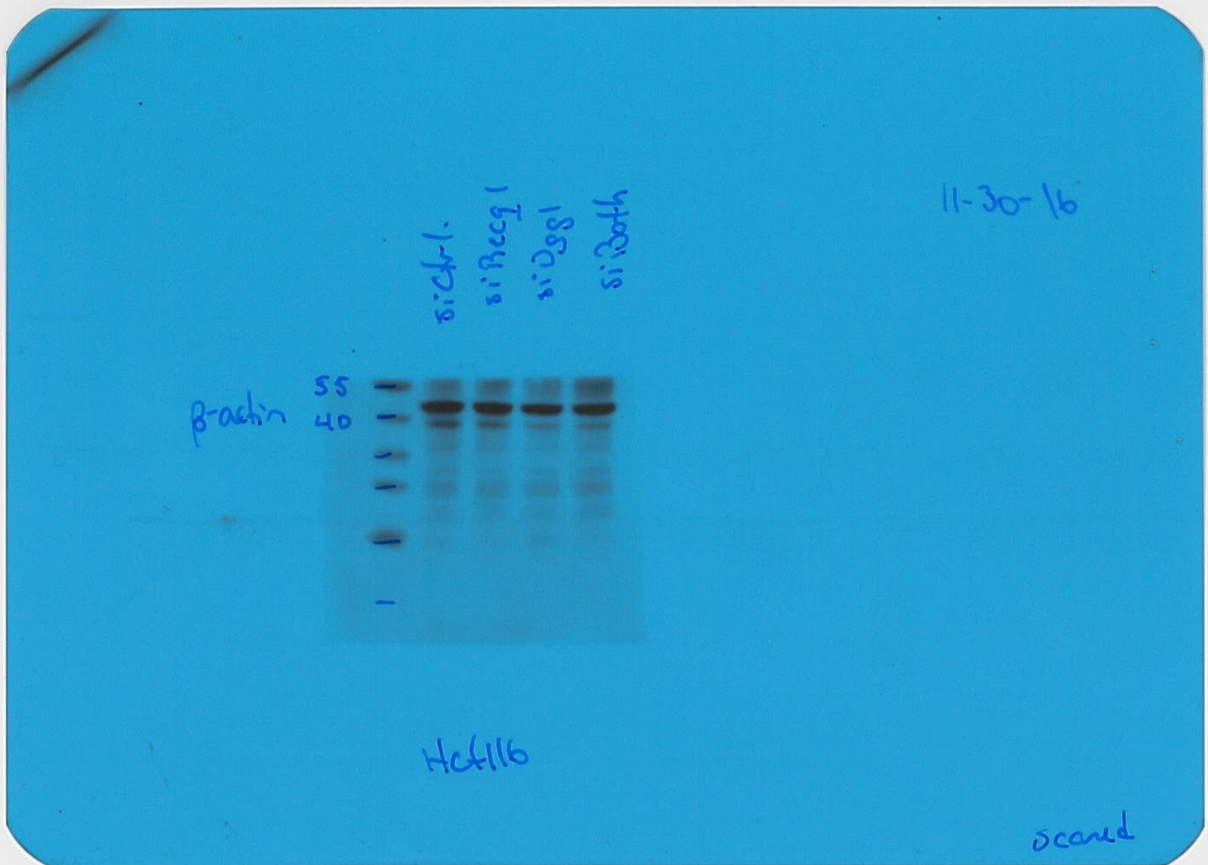

Supplement: EMBJ-36-1605-s007.pdf [file EMBJ-36-1605-s007.pdf]
